# Supplementary material for: Effect of heat treatment on the digestion behavior of pea and rice protein dispersions and their blends, studied using the semi-dynamic INFOGEST digestion method
Source: Royal Society of Chemistry journal article supplement (doi:10.1039/d1fo01223a), 2021-01-01
Supplement: d1fo01223a1.pdf [file d1fo01223a1.pdf]

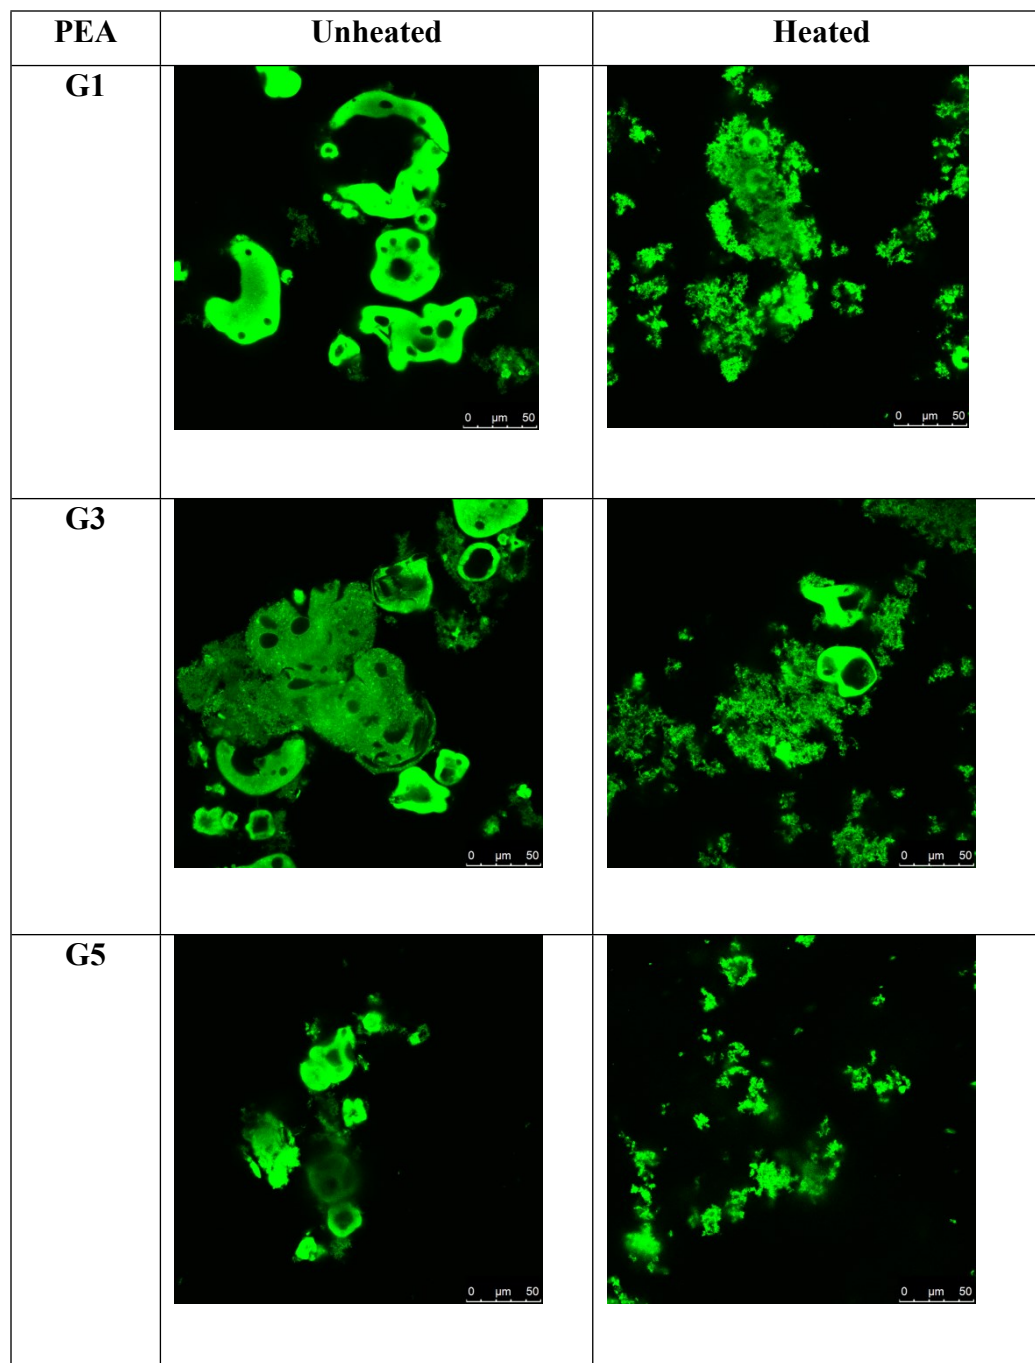

**Supplementary Figure 1.** Microstructure (confocal laser scanning microscopy, right hand side) images of digesta for Pea Protein isolate (PPI) suspensions (5% protein, w/w) dispersed at room temperature (first row) or heated at 90°C for 15 min (second row). Different gastric end point shown: G1 (10.72 min), G3 (32.1 min), G5 (53.53 min). Scale bars: 50  $\mu\text{m}$ .

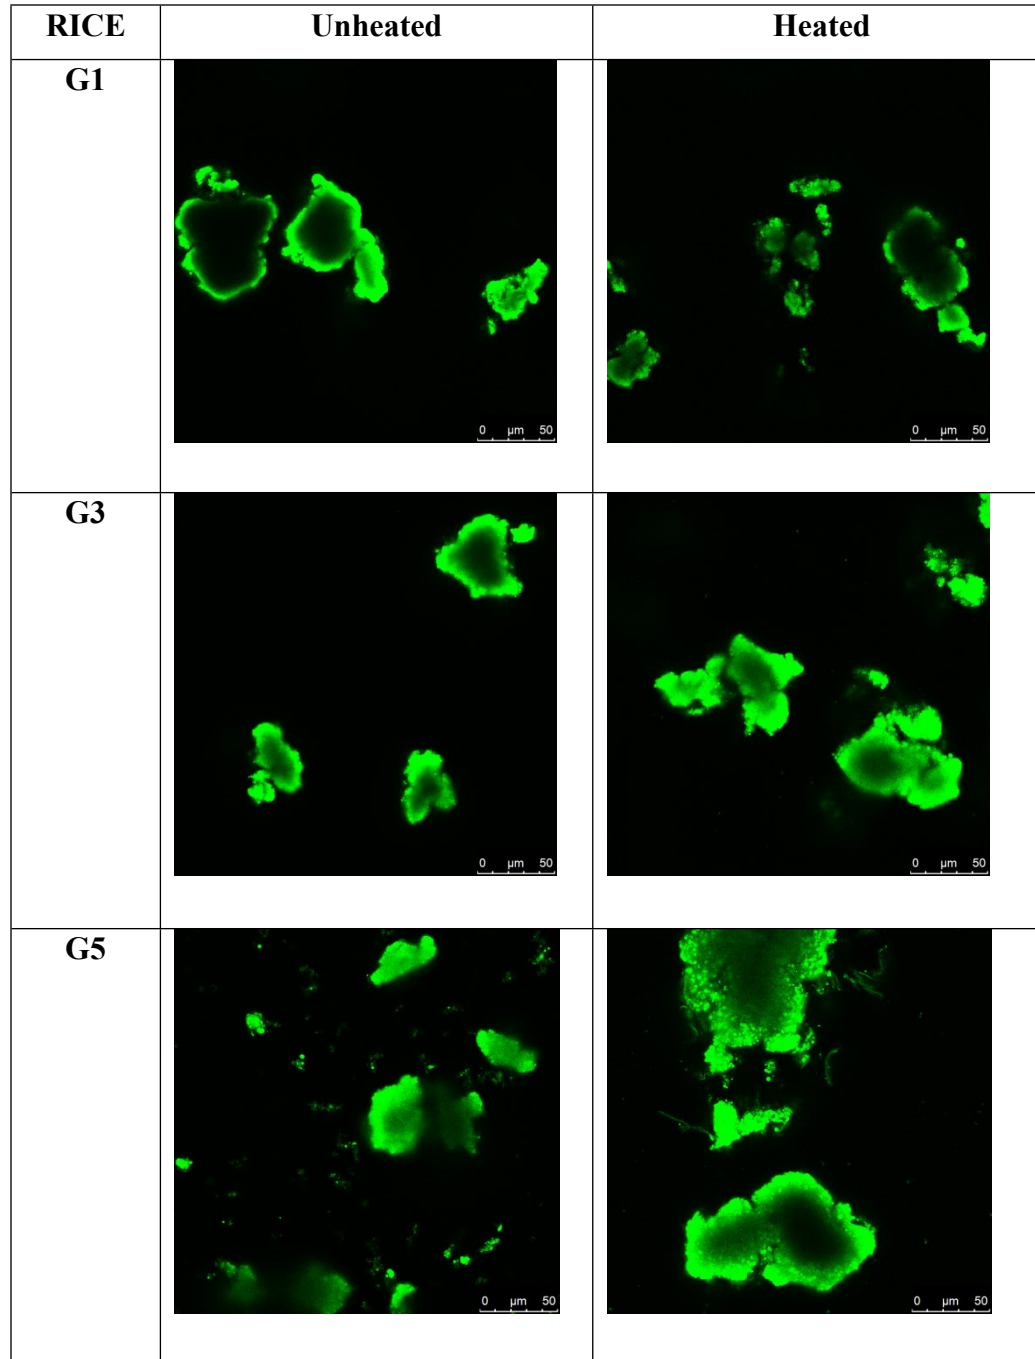

**Supplementary Figure 2.** Microstructure (confocal laser scanning microscopy, right hand side) images of digesta for Rice Protein isolate (RPI) suspensions (5% protein, w/w) dispersed at room temperature (first row) or heated at 90°C for 15 min (second row). Different gastric end point shown: G1 (10.72 min), G3 (32.1 min), G5 (53.53 min). Scale bars:50  $\mu\text{m}$ .

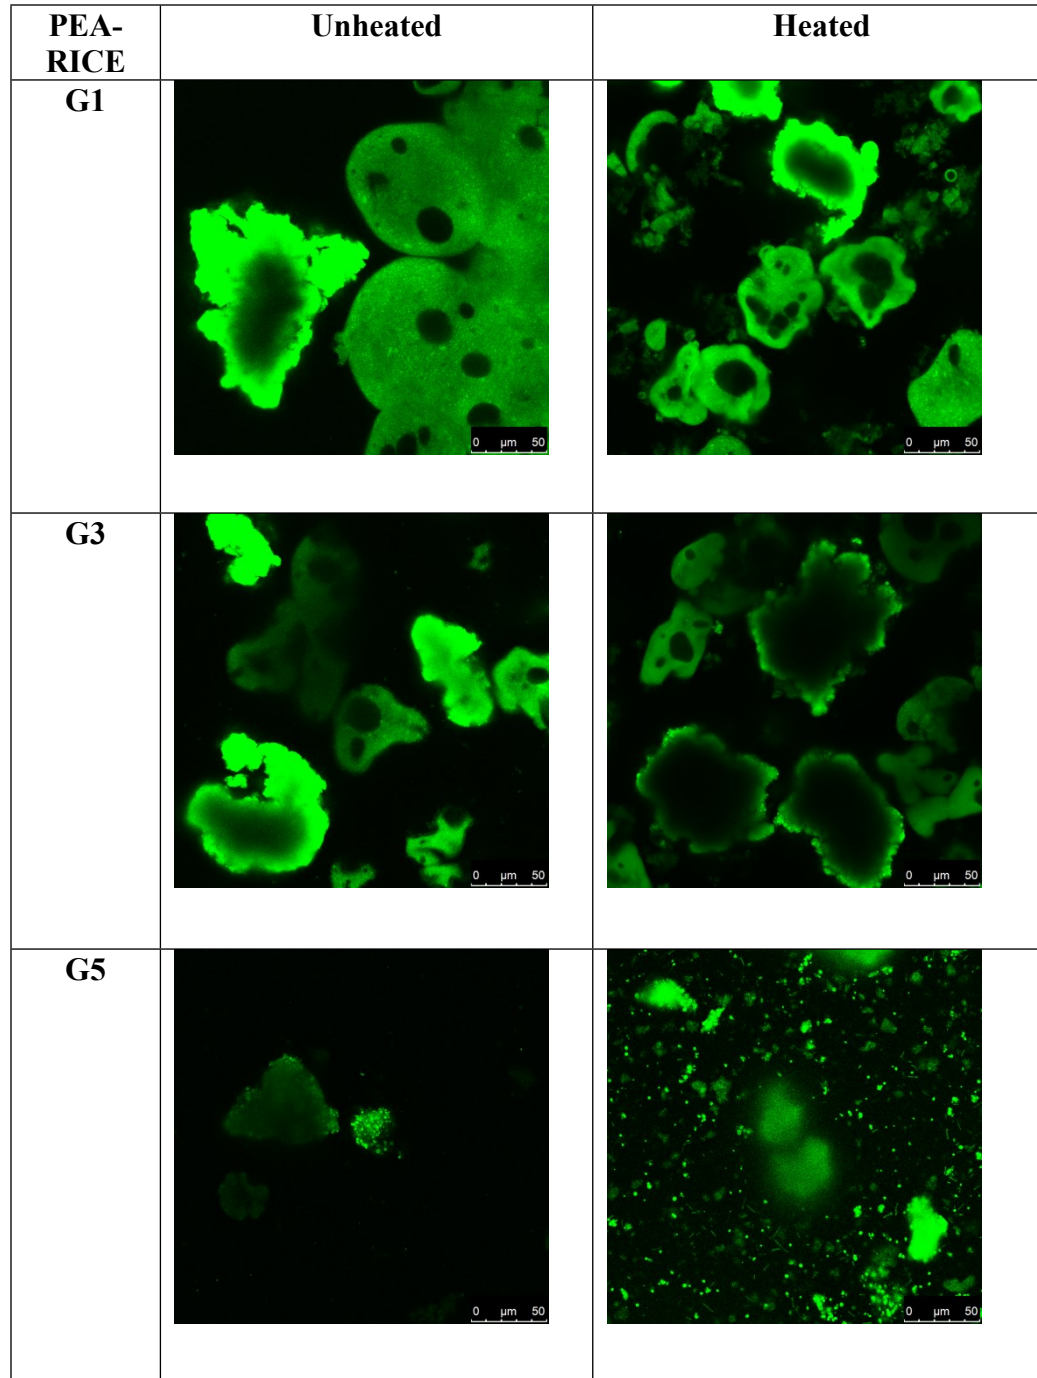

**Supplementary Figure 3.** Microstructure (confocal laser scanning microscopy, right hand side) images of digesta for the mixture of Pea and Rice Protein isolate suspensions (5% protein, w/w) dispersed at room temperature (first row) or heated at 90°C for 15 min (second row). Different gastric end point shown: G1 (10.72 min), G3 (32.1 min), G5 (53.53 min). Scale bars: 50  $\mu\text{m}$ .

## Comparison of heated and unheated samples by gel Electrophoresis

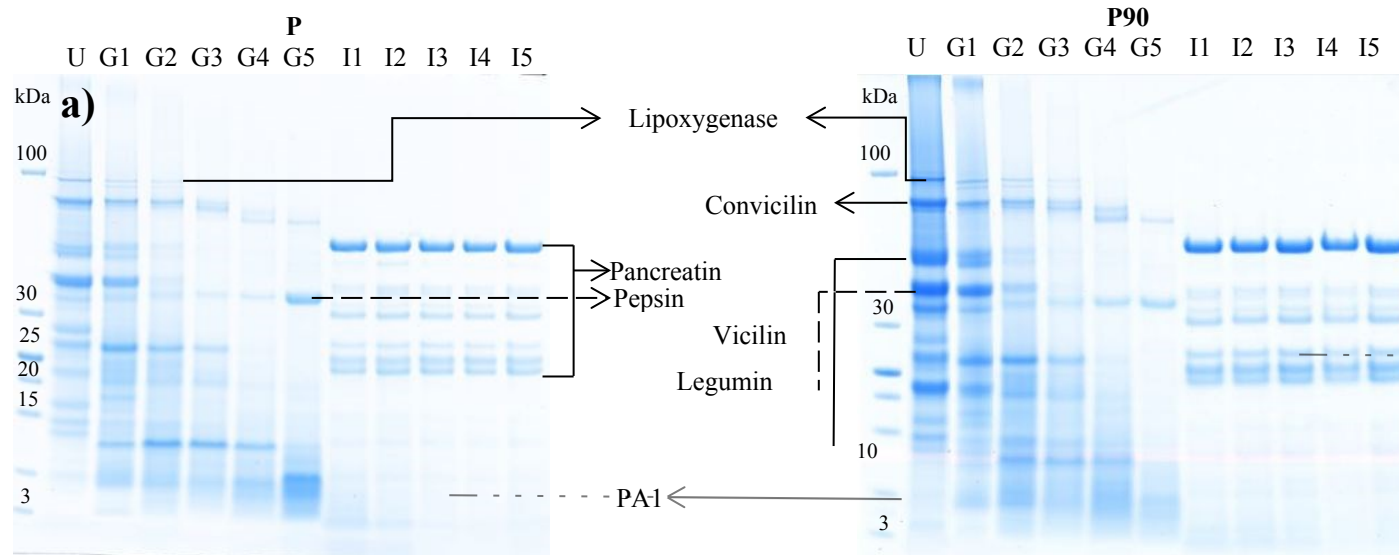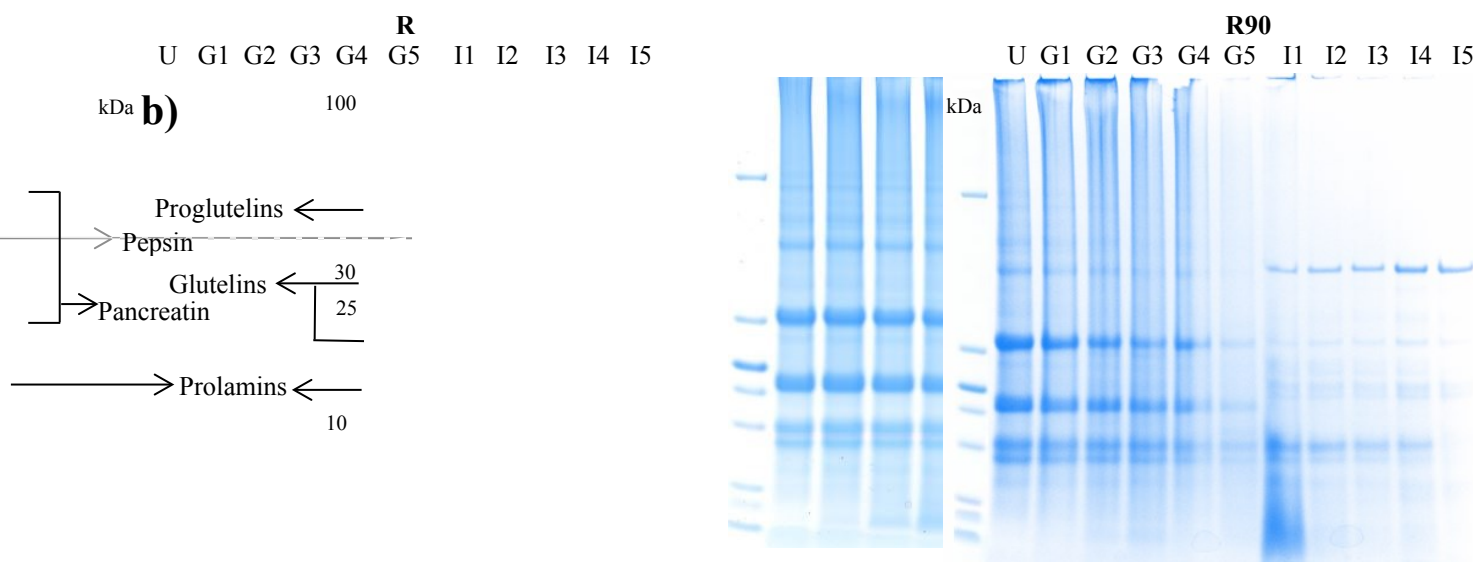

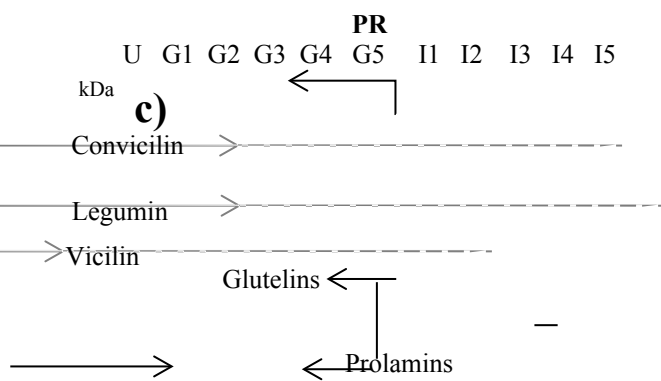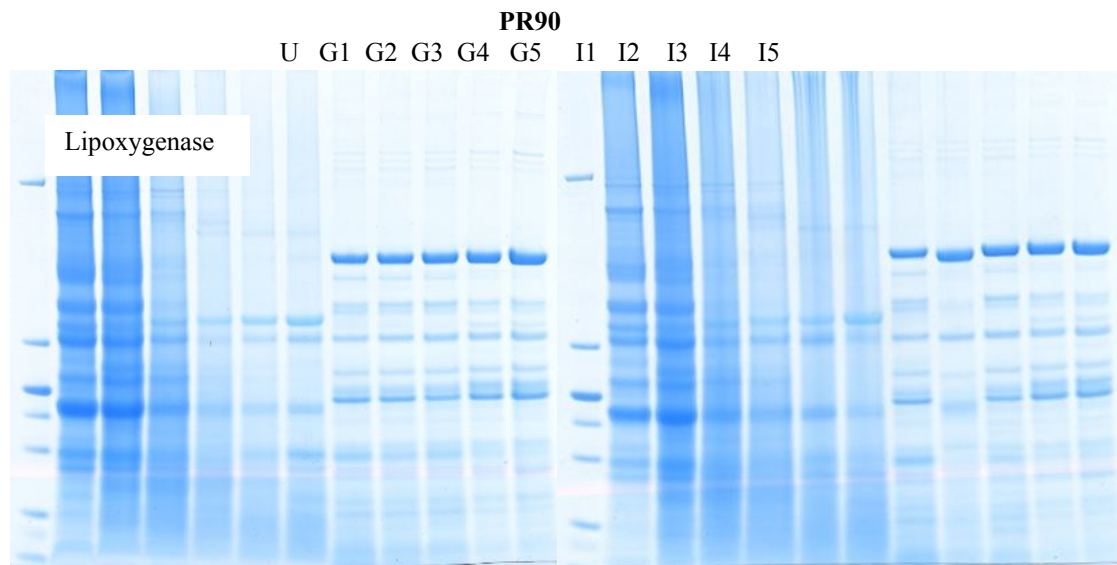

**Supplementary Figure 4.** Comparison of SDS PAGE profiles of protein dispersions (5%, w/w): **a)** pea room temperature (P), pea 90°C (P90). **b)** rice room temperature (R), rice 90°C (R90) and **c)** their blends pea-rice 2:1, room temperature (PR) and 90°C (PR90). U: undigested samples, Gastric points: GE1 (10.72 min), GE2 (21.45 min), GE3, (32.17 min), GE4 (42.9 min), GE5 (53.62 min). Intestinal endpoints taken after 15 min of digestion: I1 (following G1), I2 (following G2), I3 (following G3), I4 (following G4), I5 (following G5).

Statistical results obtained by applying two-way Manova on SEC-HPLC molecular weight distribution data

---

Multivariate Tests<sup>a</sup>

| Effect                      |               | Value | F                     | Hypothesis df | Error df | Sig. | Partial Eta Squared |
|-----------------------------|---------------|-------|-----------------------|---------------|----------|------|---------------------|
| Intercept                   | Wilks' Lambda | ,005  | 8893,462 <sup>b</sup> | 2,000         | 83,000   | ,000 | ,995                |
| Treatment                   | Wilks' Lambda | ,834  | 8,268 <sup>b</sup>    | 2,000         | 83,000   | ,001 | ,166                |
| Source                      | Wilks' Lambda | ,078  | 106,874 <sup>b</sup>  | 4,000         | 166,000  | ,000 | ,720                |
| Timepoints                  | Wilks' Lambda | ,004  | 208,111 <sup>b</sup>  | 12,000        | 166,000  | ,000 | ,938                |
| Treatment*Source            | Wilks' Lambda | ,809  | 4,639 <sup>b</sup>    | 4,000         | 166,000  | ,001 | ,101                |
| Treatment*Timepoints        | Wilks' Lambda | ,498  | 5,761 <sup>b</sup>    | 12,000        | 166,000  | ,000 | ,294                |
| Source*Timepoints           | Wilks' Lambda | ,038  | 28,609 <sup>b</sup>   | 24,000        | 166,000  | ,000 | ,805                |
| Treatment*Source*Timepoints | Wilks' Lambda | ,367  | 4,505 <sup>b</sup>    | 24,000        | 166,000  | ,000 | ,394                |

a. Design: Intercept + Treatment + Source + Timepoints + Treatment \* Source + Treatment \* Timepoints + Source \* Timepoints + Treatment \* Source \* Timepoints

b. Exact statistic

c. The statistic is an upper bound on F that yields a lower bound on the significance level.

**Supplementary Table 1.** Statistical significance by effect of the factors and their interactions using Wilk's Lamda. Factor "Treatment" contains two levels (room temperature and heated), "Source" contains three (pea, rice and blend) and "Timepoints" has seven levels (undigested, G1-G5 and I1).

#### Tests of Between-Subjects Effects

| Source          | Dependent Variable | Type III Sum of Squares | df | Mean Square | F      | Sig. | Partial Eta Squared |
|-----------------|--------------------|-------------------------|----|-------------|--------|------|---------------------|
| Corrected Model | Mw_Big             | 5,846 <sup>a</sup>      | 41 | ,143        | 52,734 | ,000 | ,963                |

|                                 |           |                    |    |        |           |      |      |
|---------------------------------|-----------|--------------------|----|--------|-----------|------|------|
|                                 | Mw_Medium | 5,359 <sup>b</sup> | 41 | ,131   | 36,527    | ,000 | ,947 |
|                                 | Mw_Small  | 6,776 <sup>c</sup> | 41 | ,165   | 71,682    | ,000 | ,972 |
| Intercept                       | Mw_Big    | 4,050              | 1  | 4,050  | 1,498,126 | ,000 | ,947 |
|                                 | Mw_Medium | 19,622             | 1  | 19,622 | 5,483,138 | ,000 | ,985 |
|                                 | Mw_Small  | 22,874             | 1  | 22,874 | 9,921,439 | ,000 | ,992 |
| Treatment                       | Mw_Big    | ,045               | 1  | ,045   | 16,718    | ,000 | ,166 |
|                                 | Mw_Medium | ,026               | 1  | ,026   | 7,366     | ,008 | ,081 |
|                                 | Mw_Small  | ,003               | 1  | ,003   | 1,095     | ,298 | ,013 |
| Source                          | Mw_Big    | 1,228              | 2  | ,614   | 227,188   | ,000 | ,844 |
|                                 | Mw_Medium | ,565               | 2  | ,282   | 78,893    | ,000 | ,653 |
|                                 | Mw_Small  | ,403               | 2  | ,201   | 87,350    | ,000 | ,675 |
| Timepoints                      | Mw_Big    | 2,392              | 6  | ,399   | 147,454   | ,000 | ,913 |
|                                 | Mw_Medium | 4,015              | 6  | ,669   | 186,985   | ,000 | ,930 |
|                                 | Mw_Small  | 4,833              | 6  | ,805   | 349,367   | ,000 | ,961 |
| Treatment * Source              | Mw_Big    | ,027               | 2  | ,014   | 5,017     | ,009 | ,107 |
|                                 | Mw_Medium | ,070               | 2  | ,035   | 9,817     | ,000 | ,189 |
|                                 | Mw_Small  | ,010               | 2  | ,005   | 2,187     | ,119 | ,050 |
| Treatment * Timepoints          | Mw_Big    | ,103               | 6  | ,017   | 6,322     | ,000 | ,311 |
|                                 | Mw_Medium | ,125               | 6  | ,021   | 5,806     | ,000 | ,293 |
|                                 | Mw_Small  | ,075               | 6  | ,012   | 5,398     | ,000 | ,278 |
| Source * Timepoints             | Mw_Big    | 1,842              | 12 | ,154   | 56,782    | ,000 | ,890 |
|                                 | Mw_Medium | ,392               | 12 | ,033   | 9,128     | ,000 | ,566 |
|                                 | Mw_Small  | 1,355              | 12 | ,113   | 48,971    | ,000 | ,875 |
| Treatment * Source * Timepoints | Mw_Big    | ,208               | 12 | ,017   | 6,409     | ,000 | ,478 |
|                                 | Mw_Medium | ,167               | 12 | ,014   | 3,880     | ,000 | ,357 |
|                                 | Mw_Small  | ,098               | 12 | ,008   | 3,548     | ,000 | ,336 |
| Error                           | Mw_Big    | ,227               | 84 | ,003   |           |      |      |
|                                 | Mw_Medium | ,301               | 84 | ,004   |           |      |      |
|                                 | Mw_Small  | ,194               | 84 | ,002   |           |      |      |

a. R Squared = ,963 (Adjusted R Squared = ,944)

b. R Squared = ,947 (Adjusted R Squared = ,921)

c. R Squared = ,972 (Adjusted R Squared = ,959)

**Supplementary Table 2.** Statistical differences in the means of response variables according to individual factors and their interactions. Response variable “Mw\_Big” corresponds for proteins and polypeptides in the range of 90-15 kDa, “Mw\_Medium” for polypeptides between 15-2 kDa and “Mw\_Small” for peptides below 2 kDa.

**Mw\_Medium**

Tukey HSD<sup>a,b</sup>

**Mw\_Big**

Tukey HSD<sup>a,b</sup>

| Source | N  | Subset |        |        |
|--------|----|--------|--------|--------|
|        |    | 1      | 2      | 3      |
| R      | 42 | ,04804 |        |        |
| PR     | 42 |        | ,20363 |        |
| P      | 42 |        |        | ,28621 |
| Sig.   |    | 1,000  | 1,000  | 1,000  |

Means for groups in homogeneous subsets are displayed.

Based on observed means.

The error term is Mean Square(Error) = ,003.

a. Uses Harmonic Mean Sample Size = 42,000.

b. Alpha = ,05.

| Source | N  | Subset |        |
|--------|----|--------|--------|
|        |    | 1      | 2      |
| P      | 42 | ,30059 |        |
| PR     | 42 |        | ,43220 |
| R      | 42 |        | ,45110 |
| Sig.   |    | 1,000  | ,321   |

Means for groups in homogeneous subsets are displayed.

Based on observed means.

The error term is Mean Square(Error) = ,004.

a. Uses Harmonic Mean Sample Size = 42,000.

b. Alpha = ,05.

**Mw\_Small**

Tukey HSD<sup>a,b</sup>

| Source | N  | Subset |        |        |
|--------|----|--------|--------|--------|
|        |    | 1      | 2      | 3      |
| PR     | 42 | ,36417 |        |        |
| P      | 42 |        | ,41320 |        |
| R      | 42 |        |        | ,50086 |
| Sig.   |    | 1,000  | 1,000  | 1,000  |

Means for groups in homogeneous subsets are displayed.

Based on observed means.

The error term is Mean Square(Error) = ,002.

a. Uses Harmonic Mean Sample Size = 42,000.

b. Alpha = ,05.

**Supplementary Table 3.** Significant different means of the three Mw distribution groups (Mw\_Big: 90-15 kDa, Mw\_Medium: 15-2, Mw\_Small: 2 kDa >) between plant protein sources (P: Pea protein isolate, R: Rice protein isolate, PR: Blend of pea and rice) by Tukey's Post hoc homogenous subsets.

**Mw\_Big**

Tukey HSD<sup>a,b</sup>

| Timepoints | N | Subset |
|------------|---|--------|
|------------|---|--------|



|      |    | 1      | 2      | 3      | 4      |
|------|----|--------|--------|--------|--------|
| G5   | 18 | ,03341 |        |        |        |
| G4   | 18 | ,05820 |        |        |        |
| G3   | 18 | ,08400 |        |        |        |
| G2   | 18 |        | ,14041 |        |        |
| I1   | 18 |        | ,16891 |        |        |
| G1   | 18 |        |        | ,35714 |        |
| U    | 18 |        |        |        | ,41299 |
| Sig. |    | ,065   | ,654   | 1,000  | 1,000  |

Means for groups in homogeneous subsets are displayed.

Based on observed means.

The error term is Mean Square(Error) = ,003.

a. Uses Harmonic Mean Sample Size = 18,000.

b. Alpha = ,05.

### Mw\_Medium

Tukey HSD<sup>a,b</sup>

| Timepoints | N  | Subset |        |        |        |        |
|------------|----|--------|--------|--------|--------|--------|
|            |    | 1      | 2      | 3      | 4      | 5      |
| I1         | 18 | ,00000 |        |        |        |        |
| U          | 18 |        | ,32684 |        |        |        |
| G1         | 18 |        |        | ,41456 |        |        |
| G5         | 18 |        |        | ,42859 | ,42859 |        |
| G4         | 18 |        |        |        | ,47500 |        |
| G3         | 18 |        |        |        |        | ,53782 |
| G2         | 18 |        |        |        |        | ,57959 |
| Sig.       |    | 1,000  | 1,000  | ,992   | ,244   | ,365   |

Means for groups in homogeneous subsets are displayed.

Based on observed means.

The error term is Mean Square(Error) = ,004.

a. Uses Harmonic Mean Sample Size = 18,000.

b. Alpha = ,05.

### Mw\_Small

Tukey HSD<sup>a,b</sup>

| Timepoints | N | Subset |
|------------|---|--------|
|------------|---|--------|

|      |    | 1      | 2      | 3      | 4      | 5      | 6      |
|------|----|--------|--------|--------|--------|--------|--------|
| G1   | 18 | ,22830 |        |        |        |        |        |
| U    | 18 | ,26017 | ,26017 |        |        |        |        |
| G2   | 18 |        | ,28000 |        |        |        |        |
| G3   | 18 |        |        | ,37818 |        |        |        |
| G4   | 18 |        |        |        | ,46681 |        |        |
| G5   | 18 |        |        |        |        | ,53800 |        |
| I1   | 18 |        |        |        |        |        | ,83109 |
| Sig. |    | ,428   | ,877   | 1,000  | 1,000  | 1,000  | 1,000  |

Means for groups in homogeneous subsets are displayed.

Based on observed means.

The error term is Mean Square(Error) = ,002.

a. Uses Harmonic Mean Sample Size = 18,000.

b. Alpha = ,05.

**Supplementary Table 4.** Significant different means of the three Mw distribution groups (Mw\_Big: 90-15 kDa, Mw\_Medium: 15-2, Mw\_Small: 2 kDa >) between different gastrointestinal points “Timepoints” (U: Undigested, G1-G5: Gastric emptying 1-5, I1: Intestinal point corresponding to G1) by Tukey’s Post hoc homogenous subsets.
